# Supplementary material for: Global expression of noncoding RNome reveals dysregulation of small RNAs in patients with HTLV-1–associated adult T-cell leukemia: a pilot study
Source: Research Square preprint supplement (doi:10.21203/rs.3.rs-69386/v2), 2021-01-13
Supplement: Supplementary file 1 [file 0fe96d149f1de663b7055f19.xlsx]

## Sheet: Sheet1
Table 1. Demographic and clinical characteristics of study subjects.
Sample	Sex	Age (Years)	Clinical status	Clonality featuers	Proviral load (copies/1000 PBMCs)	Total input reads	Total filtered reads (%)	Mapped reads
131ASP	Female	52	Asymptomatic	Polyclonal	17	4,029,944	781,412 (19,39%)	3248532
146ASP	Female	59	Asymptomatic	Polyclonal	208	12,762,102	2,906,807 (22,78%)	9855295
151ASP	Female	72	Asymptomatic	Polyclonal	1	11,798,500	1,847,981 (15,66%)	9950519
152ASP	Female	34	Asymptomatic	Polyclonal	60	6,451,236	904,790 (14,03%)	5546446
167ASP	Female	58	Asymptomatic	Polyclonal	32	5,947,163	953,127 (16,03%)	4994036
172ASP	Female	31	Asymptomatic	Polyclonal	102	4,454,137	737,503 (16,56%)	3716634
182ASP	Female	80	Asymptomatic	Polyclonal	22	7,316,342	1,431,104 (19,56%)	5885238
188ASP	Female	49	Asymptomatic	Polyclonal	8	9,232,541	2,325,497 (25,19%)	6907044
001ATLL	Female	65	Lymphomatous	Monoclona	3297	7,344,758	1,914,409 (26,06%)	5430349
005ATLL	Male	73	Chronic	Monoclona	207	5,482,002	1,487,974 (27,14%)	3994028
007ATLL	Male	58	Chronic	Monoclona	283	8,320,364	2,056,148 (24,71%)	6264216
017ATLL	Female	35	Chronic	Monoclona	104	9,024,187	2,474,763 (27,42%)	6549424
171ATLL	Male	56	Acute	Monoclona	957	4,030,123	209,221 (5,19%)	3820902
227ATLL	Female	24	Acute	Monoclona	4482	2,473,707	210,428 (8,51%)	2263279
238ATLL	Male	34	Acute	Monoclona	2277	2,067,310	187,676 (9,08%)	1879634
269ATLL	Male	43	Acute	Monoclona	846	8,771,571	345,333 (3,94%)	8426238
275ATLL	Female	34	Acute	Monoclona	508	5,497,660	200,073 (3,64%)	5297587
342ATLL	Female	39	Acute	Monoclona	898	6,977,352	750,867 (10,76%)	6226485
002HC	Female	38	HC	ND	NA	3,716,097	430,662 (11,59%)	3285435
003HC	Male	53	HC	ND	NA	8,962,210	910,815 (10,16%)	8051395
004HC	Female	37	HC	ND	NA	5,086,522	845,267 (16,62%)	4241255
005HC	Male	32	HC	ND	NA	2,978,098	473,954 (15,91%)	2504144
006HC	Female	32	HC	ND	NA	6,700,098	866,374 (12,93%)	5833724
Abbreviations: HTLV-1;Human T-lymphotropic virus type I, ASP; asymptomatic carriers with polyclonal T cell receptor gamma (γ) gene rearrangement, ASM; asymptomatic carriers with monoclonal T cell receptor γ gene rearrangement asymptomatic monoclonal rearrangement of TCR-γ, ASP; asymptomatic polyclonal rearrangement of TCR-γ, TCR-γ; T-cell antigen receptor γ-chain, HCs; healthy controls, ND; not d…
